# Supplementary material
Source: PubMed Central journal article supplement (PMC3988316)

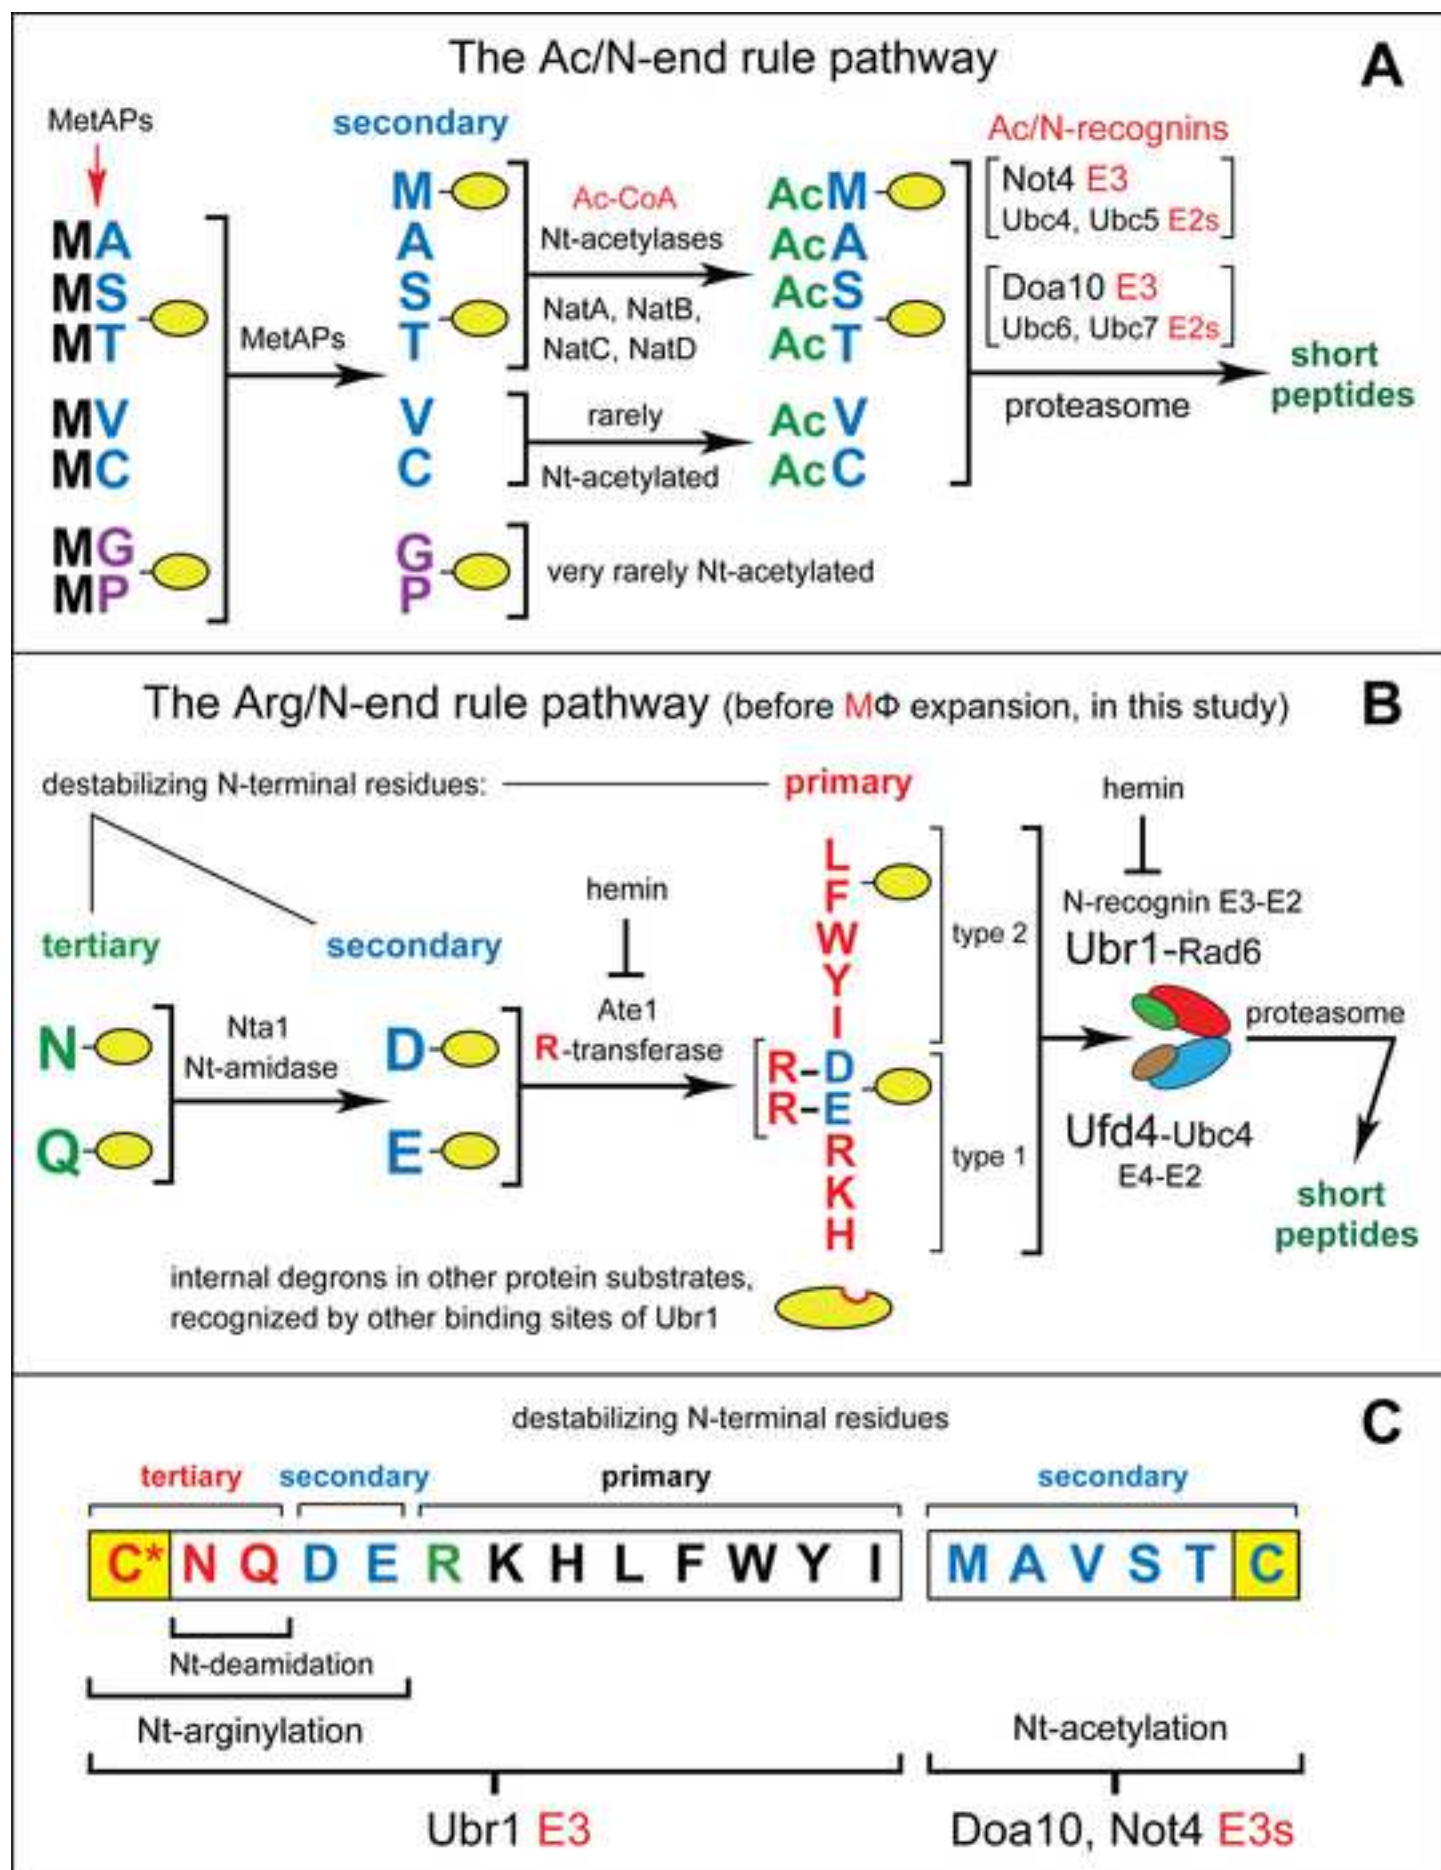

Figure S1, Kim et al.

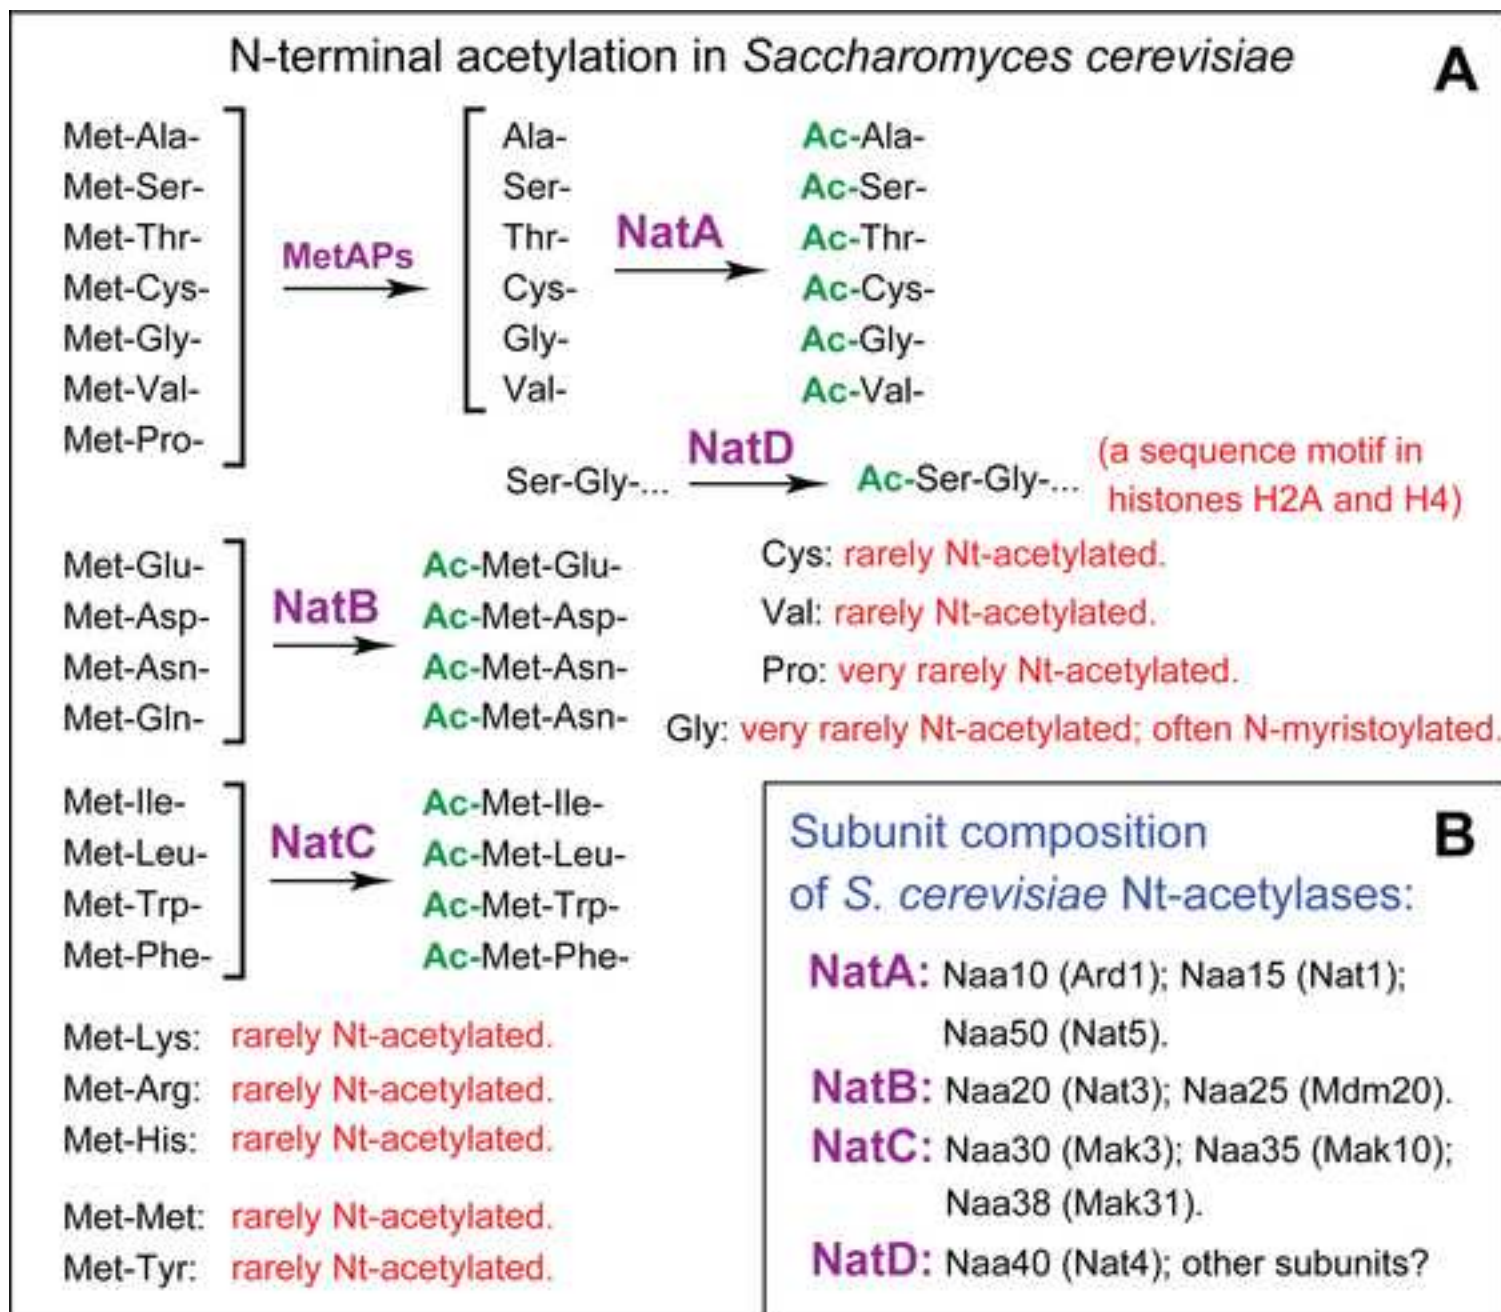

Figure S2, Kim et al.

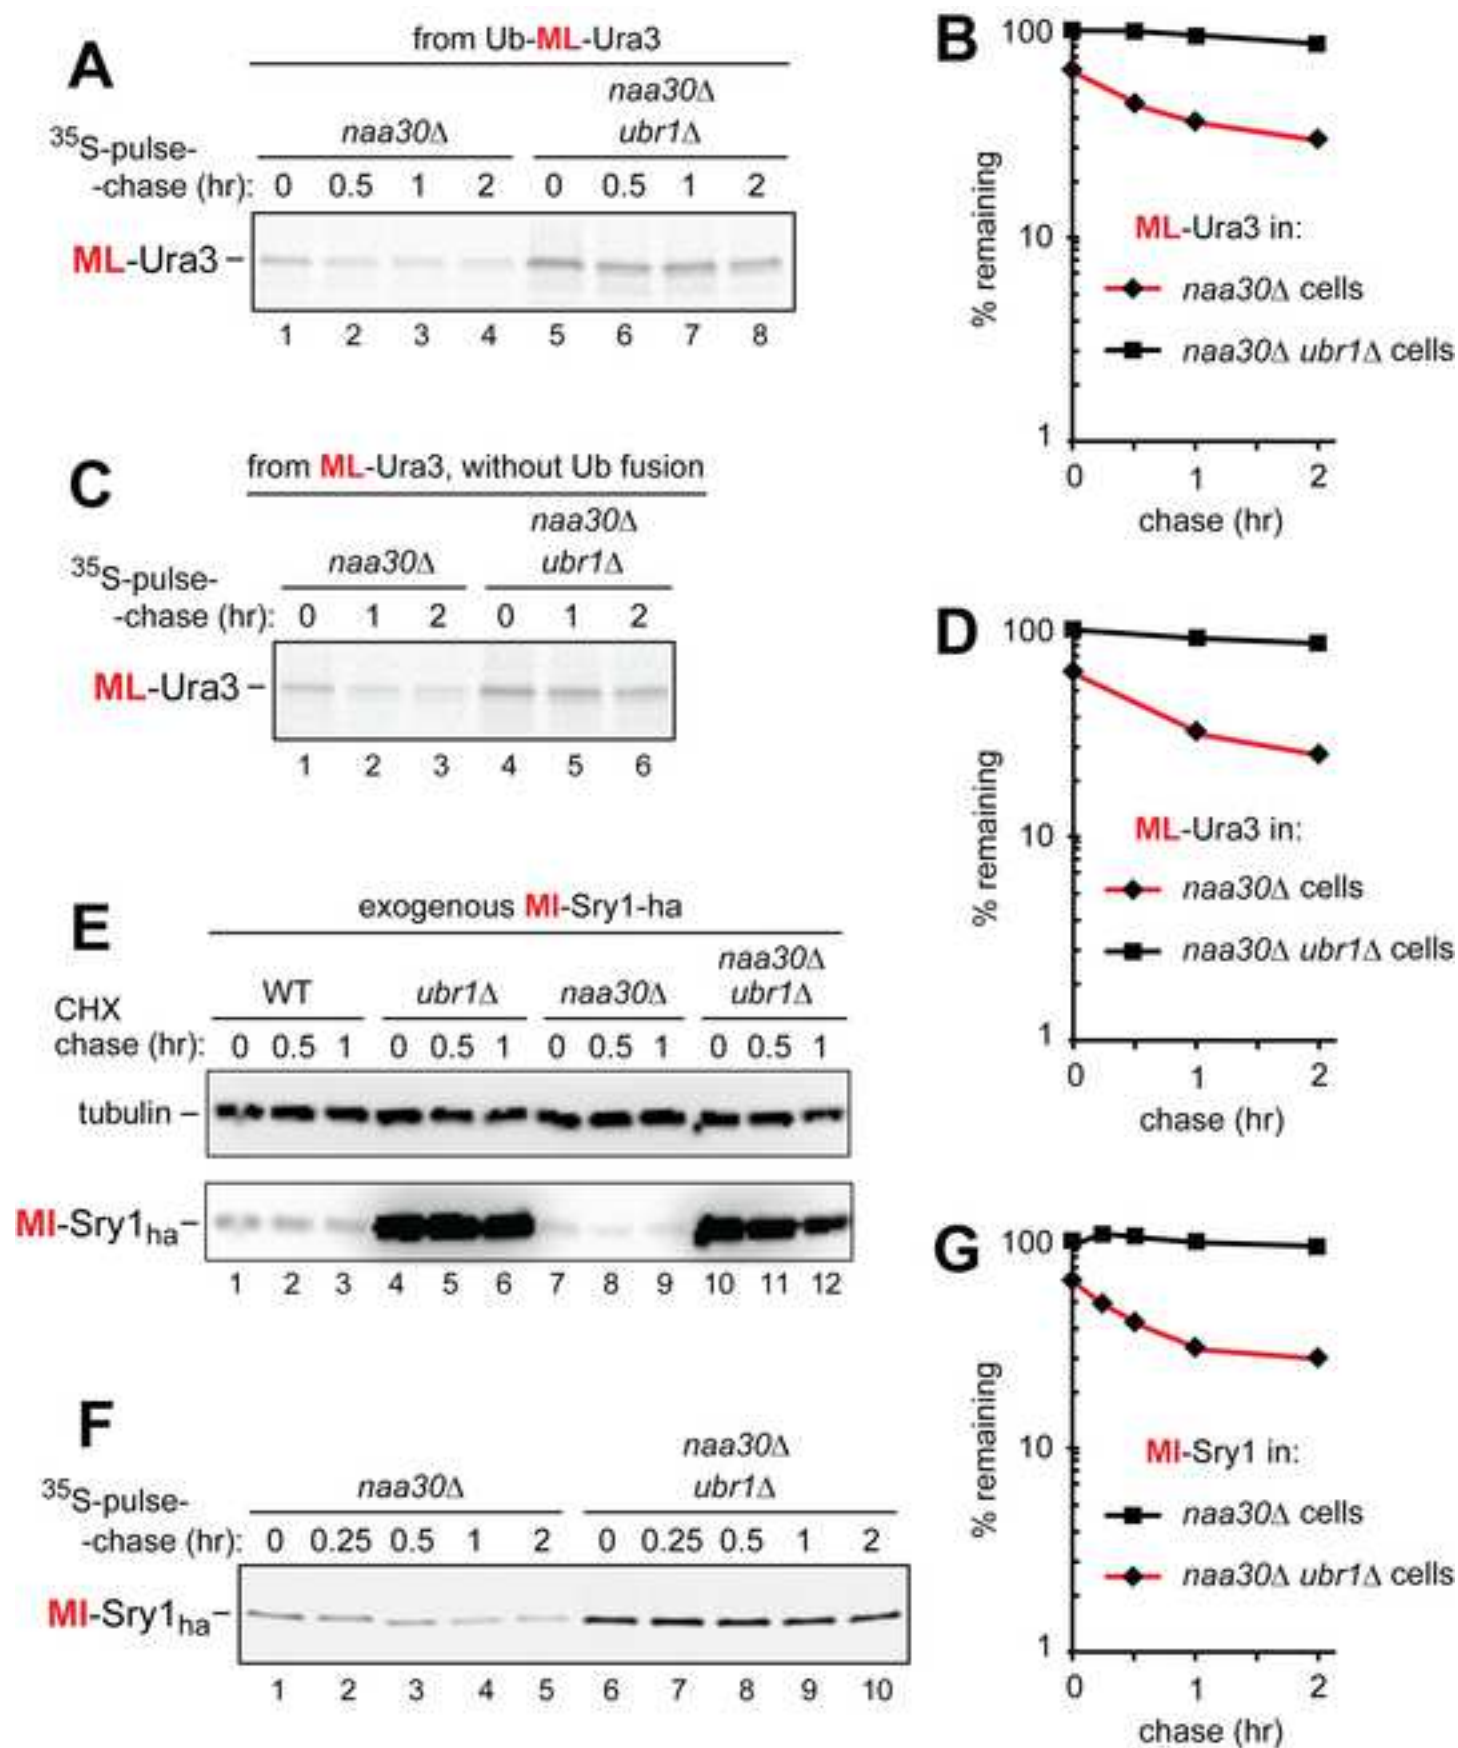

Figure S3, Kim et al.

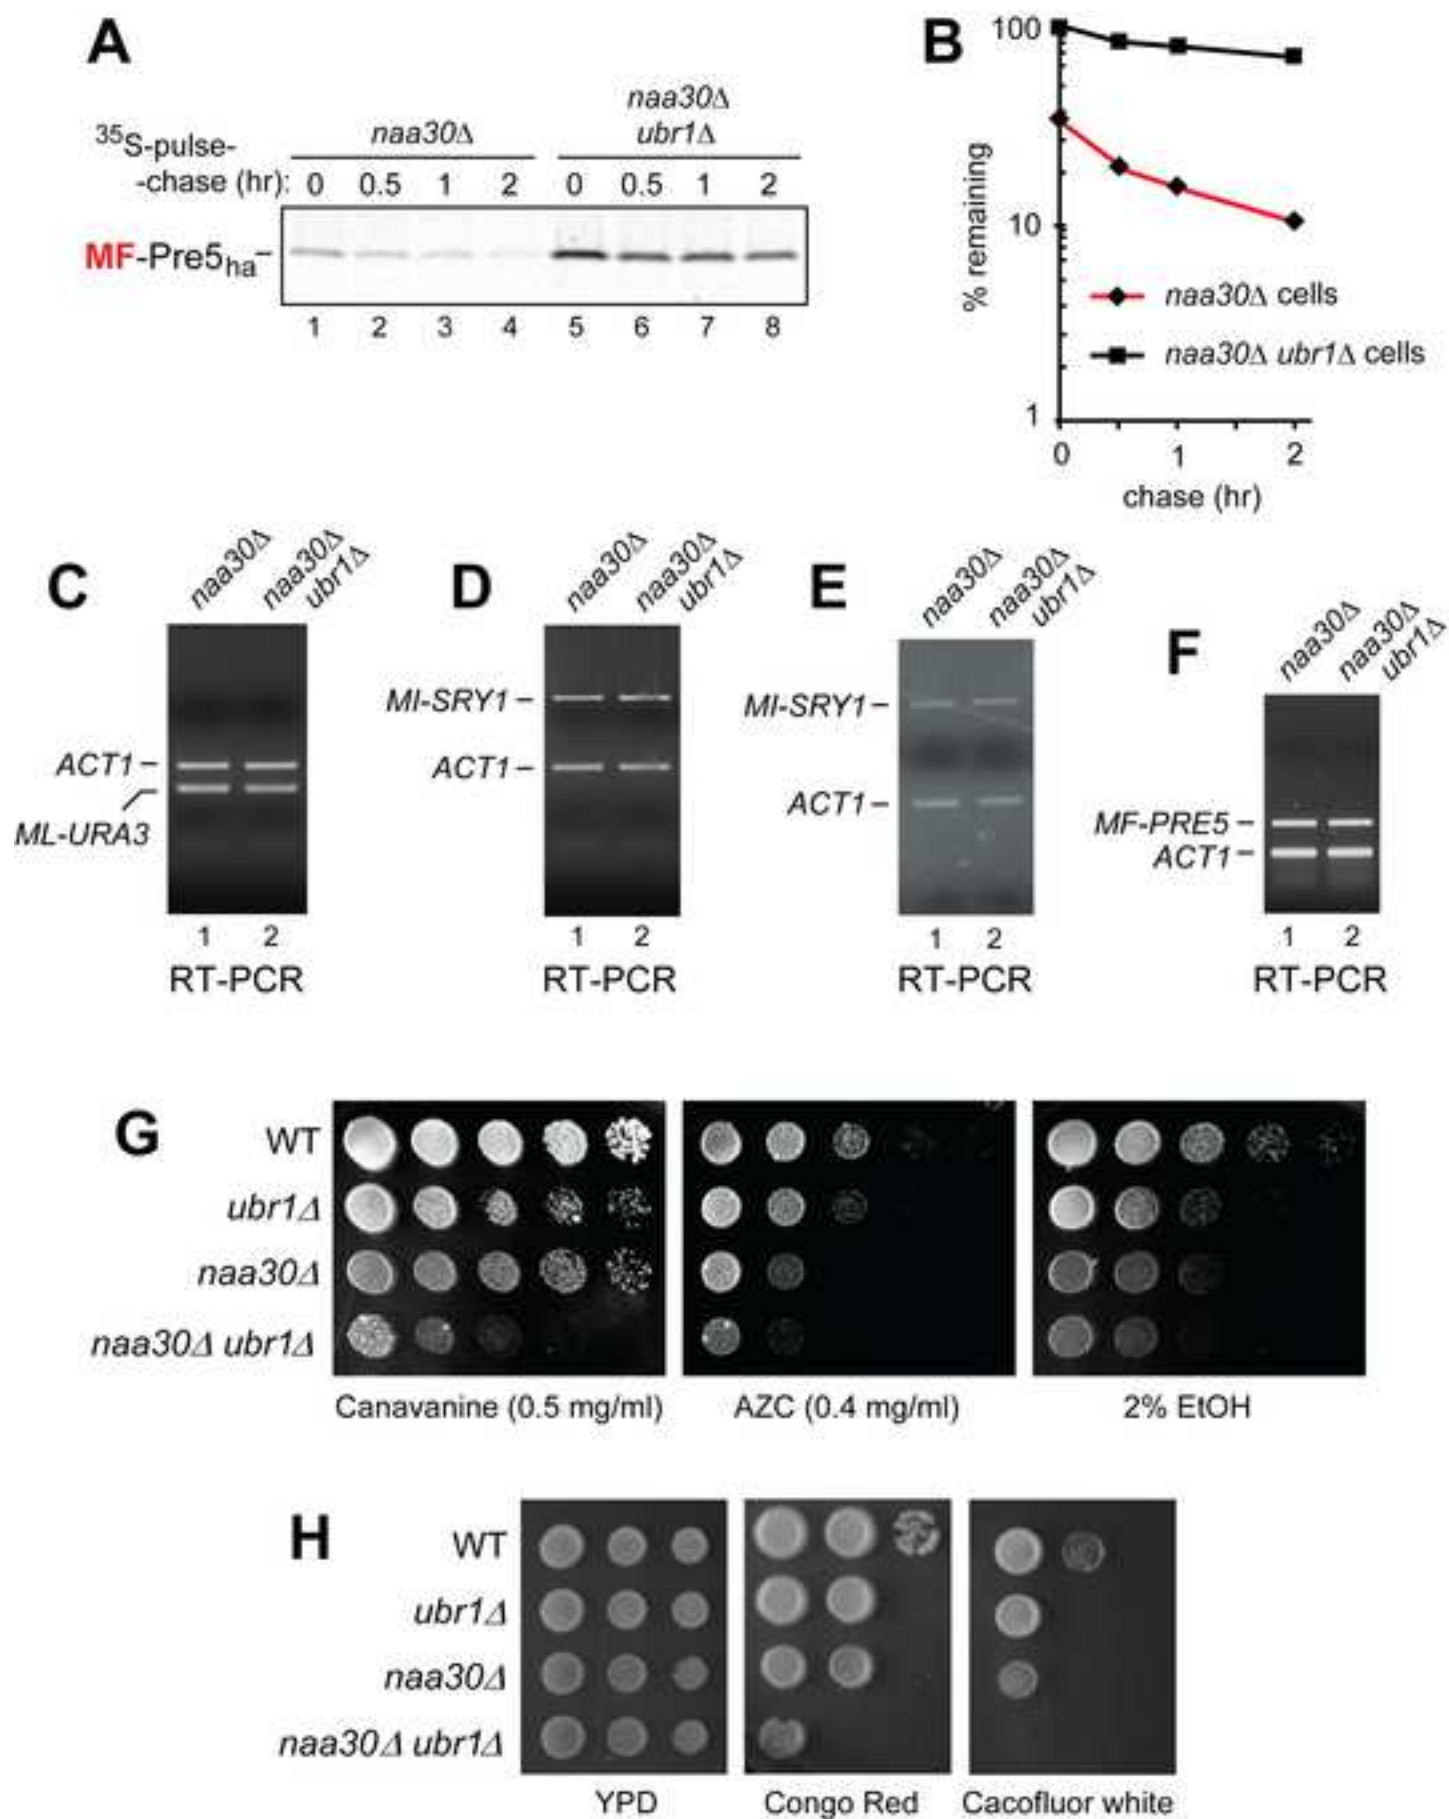

Figure S4, Kim et al.

Supplement: NIHMS551979-supplement-02.pdf [file NIHMS551979-supplement-02.pdf]
